# Supplementary material for: A role for Biofoundries in rapid development and validation of automated SARS-CoV-2 clinical diagnostics
Source: PubMed Central journal article supplement (PMC7479142; doi:10.1038/s41467-020-18130-3), 2020-09-08
Supplement: 41467_2020_18130_MOESM1_ESM.pdf [file 41467_2020_18130_MOESM1_ESM.pdf]

# **Supplementary Information – A new role for Biofoundries in rapid development and validation of automated SARS-CoV-2 clinical diagnostics**

Crone et al.

## Supplementary Figures

**a**

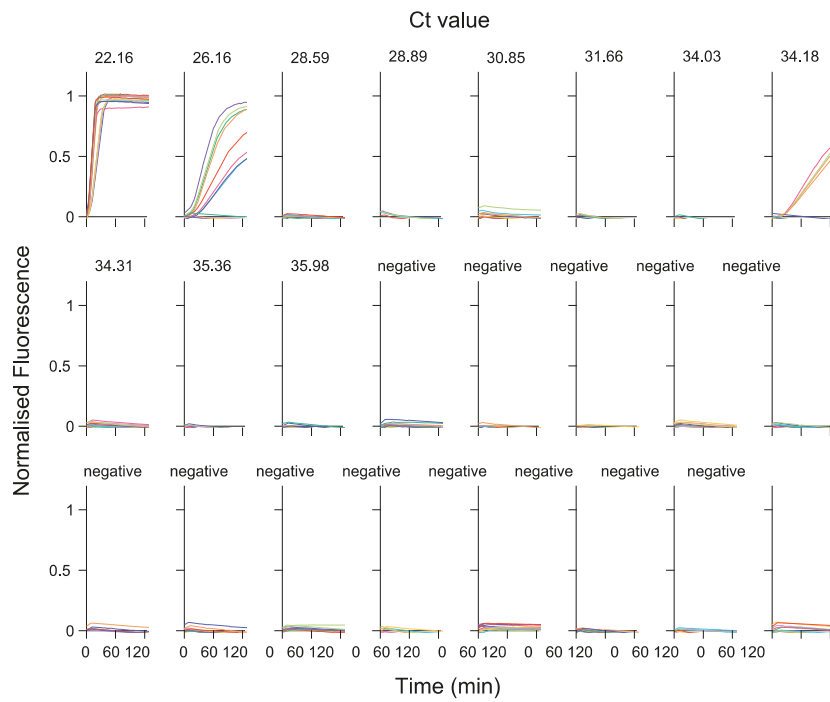

**b**

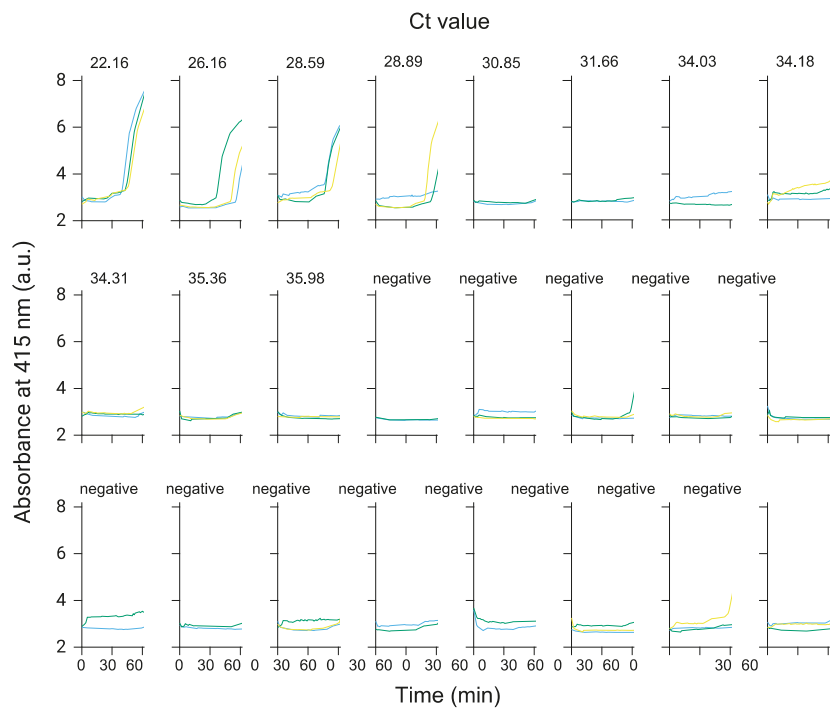

**Supplementary Figure 1: Patient Sample Validation for LAMP and RPA-CRISPR Assays. (a)** Individual traces for the RPA-CRISPR patient assays for 24 patient samples. **(b)** Individual traces for the colorimetric LAMP patient assays for 24 patient samples.

## Supplementary Tables

**Supplementary Table 1: Patient Sample Validation for LAMP and RPA-CRISPR Assays.**

| Sample | RT-qPCR (ct value) | Copies per reaction |         |            | Viral copies/mL viral transport media |
|--------|--------------------|---------------------|---------|------------|---------------------------------------|
|        |                    | PCR                 | LAMP    | RPA-CRISPR |                                       |
| 1      | 22.16              | 6409.91             | 2563.96 | 3204.95    | 320495.36                             |
| 2      | 26.16              | 422.20              | 168.88  | 211.10     | 21109.93                              |
| 3      | 28.59              | 80.88               | 32.35   | 40.44      | 4044.14                               |
| 4      | 28.89              | 65.96               | 26.38   | 32.98      | 3297.81                               |
| 5      | 30.85              | 17.39               | 6.96    | 8.70       | 869.70                                |
| 6      | 31.66              | 10.03               | 4.01    | 5.01       | 501.36                                |
| 7      | 34.03              | 2.00                | 0.80    | 1.00       | 100.05                                |
| 8      | 34.18              | 1.81                | 0.72    | 0.90       | 90.35                                 |
| 9      | 34.31              | 1.65                | 0.66    | 0.83       | 82.70                                 |
| 10     | 35.36              | 0.81                | 0.32    | 0.40       | 40.50                                 |
| 11     | 35.98              | 0.53                | 0.21    | 0.27       | 26.56                                 |
| 12     |                    |                     |         |            |                                       |
| 13     |                    |                     |         |            |                                       |
| 14     |                    |                     |         |            |                                       |
| 15     |                    |                     |         |            |                                       |
| 16     |                    |                     |         |            |                                       |
| 17     |                    |                     |         |            |                                       |
| 18     |                    |                     |         |            |                                       |
| 19     |                    |                     |         |            |                                       |
| 20     |                    |                     |         |            |                                       |
| 21     |                    |                     |         |            |                                       |
| 22     |                    |                     |         |            |                                       |
| 23     |                    |                     |         |            |                                       |
| 24     |                    |                     |         |            |                                       |

Copies per reaction are calculated using the line of best fit from the standard curve in Figure 2b ( $y = -3.386x + 35.06$ ) and differ based on input volume between RT-qPCR (5  $\mu$ L), LAMP (2  $\mu$ L) and RPA-CRISPR (2.5  $\mu$ L). The number of viral copies per millilitre of transport media is assuming 100% extraction efficiency with a sample volume of 200  $\mu$ L and elution volume of 50  $\mu$ L. Blocks highlighted in yellow were detected in the LAMP or RPA-CRISPR assays.

**Supplementary Table 2: Summary of available diagnostic methodologies for high-throughput testing.**

| Assay                                  | Commercial Reagents                                | Limit of Detection (gene)                                          | Time to Result  | HT Techniques                        | Advantages                                                | Disadvantages                                                                    |
|----------------------------------------|----------------------------------------------------|--------------------------------------------------------------------|-----------------|--------------------------------------|-----------------------------------------------------------|----------------------------------------------------------------------------------|
| RT-qPCR (this work)                    | NEB (E3005L), ThermoFisher (A15299 or 4444432)     | 1 copy per reaction (N)                                            | 150 minutes     | Automated RNA extraction, Echo setup | Highest sensitivity                                       | Thermocycling                                                                    |
| RT-LAMP (this work)                    | NEB (M1800L)                                       | ~30 copies per reaction (N)                                        | 100 minutes     | Automated RNA extraction, Echo setup | Isothermal amplification                                  | Potential non-specific amplification<br><br>No multiplexing in a single reaction |
| RT-PCR-CRISPR (this work)              | RT-PCR: NEB (E3005L)<br><br>LwCas13a: In-house     | ~2.5 copies per reaction (N)                                       | 170 minutes     | Automated RNA extraction, Echo setup | Plate reader instead of qPCR results in higher throughput | Thermocycling<br><br>More complicated setup                                      |
| RPA-CRISPR (this work)                 | RPA: TwistDx (TALQBAS01)<br><br>LwCas13a: In-house | ~200 copies per reaction (ORF1ab)                                  | 150-210 minutes | Automated RNA extraction, Echo setup | Higher throughput than RTqPCR                             | Not as sensitive as alternatives<br><br>More complicated assay setup             |
| LAMP-CRISPR (IDT/Sherlock Biosciences) | IDT/Sherlock Biosciences (10006968)                | 360 copies per reaction (ORF1ab)<br><br>72 copies per reaction (N) | 120 minutes     | Multichannel setup                   | Short time to result                                      | Very complicated assay setup<br><br>Low throughput (190 per shift per operator)  |

**Supplementary Table 3: Primer and Probe Sequences for qPCR/RT-ddPCR**

| Figure                     | Name         | Forward Primer        | Reverse Primer          | Probe                                 |
|----------------------------|--------------|-----------------------|-------------------------|---------------------------------------|
| 1d, 2a, 2b, 2c, 4b, 5b, 5c | 2019-nCoV_N1 | GACCCCAAATCAGCGAAAT   | TCTGGTTACTGCCAGTTGATCTG | FAM - ACCCCGCATTACGTTTGGTGGACC - BHQ1 |
| 2c                         | 2019-nCoV_N2 | TTACAAACATTGGCCGCAAA  | GCGCGACATTCCGAAGAA      | FAM - ACAATTTGCCCCAGCGCTTCAG - BHQ1   |
| 2c                         | 2019-nCoV_N3 | GGGAGCCTTGAATACACAAAA | TGTAGCACGATTGCAGCATTG   | FAM - AYCACATTGGCACCCGCAATCTG - BHQ1  |

**Supplementary Table 4: Primers and oligonucleotides for CRISPR-Cas13a reactions**

| Figure | Name                                        | Forward primer/oligonucleotide                              | Reverse primer/oligonucleotide                                                                 |
|--------|---------------------------------------------|-------------------------------------------------------------|------------------------------------------------------------------------------------------------|
| 3b, 4c | 2019-nCoV_N1 IVT<br>crRNA                   | GTATAATACGACTCACTATAGG                                      | ACCCCGCATTACGTTTGGTGGACCGTTTTAG<br>TCCCCTTCGTTTTTGGGGTAGTCTAAATCCCT<br>ATAGTGAGTCGTATTATAC     |
| 3b     | 2019-nCoV_N2 IVT<br>crRNA                   | GTATAATACGACTCACTATAGG                                      | CACAATTTGCCCCAGCGCTTCAGCGGTTTT<br>AGTCCCCTTCGTTTTTGGGGTAGTCTAAATC<br>CCTATAGTGAGTCGTATTATAC    |
| 3b     | 2019-nCoV_N3 IVT<br>crRNA                   | GTATAATACGACTCACTATAGG                                      | GATCACATTGGCACCCGAATCCTGCTGTTT<br>TAGTCCCCTTCGTTTTTGGGGTAGTCTAAAT<br>CCCTATAGTGAGTCGTATTATAC   |
| 5d     | LwCas13a orf1ab IVT<br>crRNA                | GTATAATACGACTCACTATAGG                                      | ATAGTTTAAAAATTACAGAAGAGGTTGGGT<br>TTTAGTCCCCTTCGTTTTTGGGGTAGTCTAAA<br>TCCCTATAGTGAGTCGTATTATAC |
| 3b     | 2019-nCoV_N1 PCR<br>amplification T7        | GAAATTAATACGACTCACTATAGGGACCCCAAA<br>ATCAGCGAAAT            | TCTGGTTACTGCCAGTTGAATCTG                                                                       |
| 3b     | 2019-nCoV_N2 PCR<br>amplification T7        | GAAATTAATACGACTCACTATAGGGTTACAAACA<br>TTGGCCGCAAA           | GCGCGACATTCGAAGAA                                                                              |
| 3b     | 2019-nCoV_N3 PCR<br>amplification T7        | GAAATTAATACGACTCACTATAGGGAGCCTTGA<br>ATACACCAAAA            | TGTAGCACGATTGCAGCATTG                                                                          |
| 5d     | Orf1ab RPA<br>amplification T7 <sup>1</sup> | GAAATTAATACGACTCACTATAGGGCGAAGTTG<br>TAGGAGACATTATACTTAAACC | TAGTAAGACTAGAATTGTC<br>TACATAAGCAGC                                                            |

**Supplementary Table 5: Primer and Probe Sequences for LAMP Reactions**

| Figure | Name        | Sequence                                 | Final Concentration |
|--------|-------------|------------------------------------------|---------------------|
| 3d, 5e | GeneN-A-F3  | TGGCTACTACCGAAGAGCT                      | 1.6 $\mu$ M         |
|        | GeneN-A-B3  | TGCAGCATTGTTAGCAGGAT                     | 1.6 $\mu$ M         |
|        | GeneN-A-FIP | TCTGGCCAGTTCCTAGGTAGTCCAGACGAATTCGTGGTGG | 0.2 $\mu$ M         |
|        | GeneN-A-BIP | AGACGGCATCATATGGGTTGCACGGGTGCCAATGTGATCT | 0.2 $\mu$ M         |
|        | GeneN-A-LF  | GGACTGAGATCTTTTCAATTTACCGT               | 0.4 $\mu$ M         |
|        | GeneN-A-LB  | ACTGAGGGAGCCTTGAATACA                    | 0.4 $\mu$ M         |

Primer sequences from Zhang *et al.*<sup>2</sup>

## References

1. Metsky, H. C., Freije, C. A., Kosoko-Thoroddsen, T.-S. F., Sabeti, P. C. & Myhrvold, C. CRISPR-based COVID-19 surveillance using a genomically-comprehensive machine learning approach. *bioRxiv* 2020.02.26.967026 (2020) doi:10.1101/2020.02.26.967026.
2. Zhang, Y. *et al.* Rapid Molecular Detection of SARS-CoV-2 (COVID-19) Virus RNA Using Colorimetric LAMP. *medRxiv* 2, 2020.02.26.20028373 (2020).
